# Supplementary material
Source: publisher figshare collection journal article supplement (https://tandf.figshare.com/ndownloader/files/16918658)
Supplement: Supplementary file 1 [file 16918658]

**Supplementary Material**

**Synthesis, Colloidal-Chemical and Petroleum Collecting Properties of New Counterion Coupled Gemini Surfactants Based on Hexadecylbis(2-hydroxypropyl)amine and Dicarboxylic Acids**

***Physico-chemical indices and spectral data***

Cocogem surfactant prepared from succinic acid is a white substance in solid state with melting point 35-38 °C. It is soluble in water and many organic solvents such as ethanol, but insoluble in hexane. IR, cm−1: 3368 ν (OH), 2921 and 2852 ν (CH), 2400-2600 (NH+), 1581 νas (COO−), 1372 νs (COO−), 1460 and 1287 δ (CH), 1063 ν (C−N), 719 δ (CH2)n (Fig. S4). 1H-NMR, (300.18 MHz, D2O), δ (ppm): 0.79 (CH3), 1.02-1.11 (CH−CH3), 1.19 (CH2 chain), 1.83 (CH2−CH2−N+H), 2.12 (CH2−COO-) 2.83-2.93 (N+H−CH2), 3.99 (CH−OH) (Fig. S5).13C-NMR, (75.49 MHz, D2O), δ (ppm): 13.9 (CH3), 20.3-20.6 (CH3−CH), 22.7−32.1 (alkyl group CH2), 61.2-62.2 (N+−CH2−CH2), 63.2-66.0 (N+−CH2−CH−OH), 171.5 (COO−) (Fig. S6).

Cocogem surfactant prepared from adipic acid is a white substance in solid state with melting point 48-52 °C. It is soluble in water and many organic solvents such as ethanol, acetone, isopropanol, but partially soluble in hexane. IR, cm−1: 3311 ν (OH), 2920 and 2852 ν (CH), 1561 νas (COO−), 1407 νs (COO−), 1461 and 1331 δ (CH), 1081 ν (C−N), 719 δ (CH2)n (Fig. S7). 1H-NMR, (300.18 MHz, D2O), δ (ppm): 0.76 (CH3), 1.02-1.13 (CH−CH3), 1.17 (CH2 chain), 1.45 (CH2−CH2−COO−), 1.58 (CH2−CH2−N+H), 2.09 (CH2−COO−), 2.96-3.08 (N+H−CH2), 4.04-4.06 (CH−OH) (Fig. S8). 13C-NMR, (75.49 MHz, D2O), δ (ppm): 13.9 (CH3), 20.3-20.7 (CH3−CH), 22.7−30.1 (alkyl group CH2), 36.6 (CH2−COO−), 60.5-62.5 (N+−CH2−CH−OH), 181.3 (COO−) (Fig. S9).

Cocogem surfactant prepared from sebacic acid is a viscous liquid of yellow color which reminds glue. It is soluble in water and many organic solvents such as ethanol, acetone, isopropanol, but partially soluble in hexane. IR, cm−1: 3348 ν (OH), 2922 and 2853 ν (CH), 1566 νas (COO−), 1405 νs (COO−), 1459 (CH), 1067 ν (C−N), 721 δ (CH2)n (Fig. S10). 1H-NMR, (300.18 MHz, D2O), δ (ppm): 0.79 (CH3), 1.02-1.12 (CH−CH3), 1.17-1.23 (CH2 chain), 1.47 (CH2−CH2−COO−) 1.82 (CH2−CH2−N+H), 2.06 (CH2−COO−) 3.03-3.55 (N+H−CH2), 4.05 (CH−OH) (Fig. S11). 13C-NMR, (75.48 MHz, D2O), δ (ppm): 13.9 (CH3), 20.2-20.7 (CH3−CH), 22.7−30.0 (alkyl group CH2), 54.5-55.5 (N+−CH2−CH2), 60.2-64.1 (N+−CH2−CH−OH), 180.0 (COO−) (Fig. S12).

Cocogem surfactant prepared from maleic acid is a white substance in solid state with melting point 44-47 °C which is insoluble in hexane, but very soluble in water. IR, cm−1: 3368 ν (OH), 2921 and 2852 ν (CH), 1581 νas (COO−), 1358 νs (COO−), 1460 and 1289 δ (CH), 1063 ν (C−N), 719 δ (CH2)n (Fig. S13). 1H-NMR, (300.18 MHz, D2O), δ (ppm): 0.77 (CH3), 1.02-1.11 (CH−CH3), 1.18 (CH2 chain), 2.01 (CH2−CH2−N+H), 2.92 (N+H−CH2), 3.98 (CH−OH), 6.0 (CH=CH) (Fig. S14). 13C-NMR, (75.49 MHz, D2O), δ (ppm): 13.9 (CH3), 20.3-20.6 (CH3−CH), 22.7−29.9 (alkyl group CH2), 60.4 (N+−CH2−CH2), 133.7 (CH=CH), 171.4 (COO−) (Fig. S15).

Cocogem surfactant prepared from fumaric acid is of white color and is in solid state with the melting point 73-75 °C. It has the same solubility properties as previous surfactants given above. IR, cm−1: 3350 ν (OH), 2920 and 2851 ν (CH), 1572 νas (COO−), 1358 νs (COO−), 1463 δ (CH), 1093 ν (C−N), 718 δ (CH2)n (Fig. S16). 1H-NMR, (300.18 MHz, D2O), δ (ppm): 0.76-0.78 (CH3), 1.02-1.12 (CH−CH3), 1.18 (CH2 chain), 1.46 (CH2−CH2−N+H), 2.98-3.10 (N+H−CH2), 4.05 (CH−OH), 6.11 (CH=CH) (Fig. S17). 13C-NMR, (75.49 MHz, D2O), δ (ppm): 13.9 (CH3), 20.2-20.6 (CH3−CH), 22.6−32.0 (alkyl group CH2), 59.9-60.5 (N+−CH2−CH2), 61.5-62.5 (N+−CH2−CH−OH), 181.9 (COO−) (Fig. S18).

Cocogem surfactant prepared from isophthalic acid is a highly viscous liquid of yellow color and soluble in many solvents excluding hexane where it has low solubility. IR, cm−1: 3305 ν (OH), 2922 and 2852 ν (CH), 1559 νas (COO−), 1427 νs (COO−), 1461 and 1365 δ (CH), 1076 ν (C−N), 745 δ (CH2)n (Fig. S19). 1H-NMR, (300.18 MHz, D2O), δ (ppm): 0.80 (CH3), 1.01-1.12 (CH−CH3), 1.14-1.20 (CH2 chain), 1.87 (CH2−CH2−N+H), 2.96-3.57 (N+H−CH2), 3.99-4.04 (CH−OH) (Fig. S20). 13C-NMR, (75.48 MHz, D2O), δ (ppm): 13.7 (CH3), 20.1-20.5 (CH3−CH), 22.4−31.8 (alkyl group CH2), 54.8 (N+-CH2−CH2), 61.3-62.9 (N+−CH2−CH−OH), 131.4-136.9 (benzene ring CH=CH), 173.2 (COO−) (Fig. S21).

Cocogem surfactant prepared from tartaric acid has white color and is in solid state with 55-57 °C melting point temperature. It has high solubility in water, ethanol and in some other organic solvents, but not in hexane. IR, cm−1: 3314 ν (OH), 2916 and 2840 ν (CH), 1599 νas (COO−), 1398 νs (COO−), 1462 δ (CH), 1070 ν (C−N), 719 δ (CH2)n (Fig. S22). 1H-NMR, (300.18 MHz, D2O), δ (ppm): 0.8 (CH3), 1-1.06 (CH−CH3), 1.2 (CH2 chain), 1.88 (CH2−CH2−N+H), 2.1-2.5 (N+H−CH2), 2.96 (CH−OH) (Fig. S23). 13C-NMR, (75.48 MHz, D2O), δ (ppm): 13.9 (CH3), 20.3-20.7 (CH3−CH), 22.7−32.0 (alkyl group CH2), 59.8-60.2 (N+−CH2−CH2), 61.4-62.2 (N+−CH2−CH−OH), 177.9 (COO−) (Fig. S24).


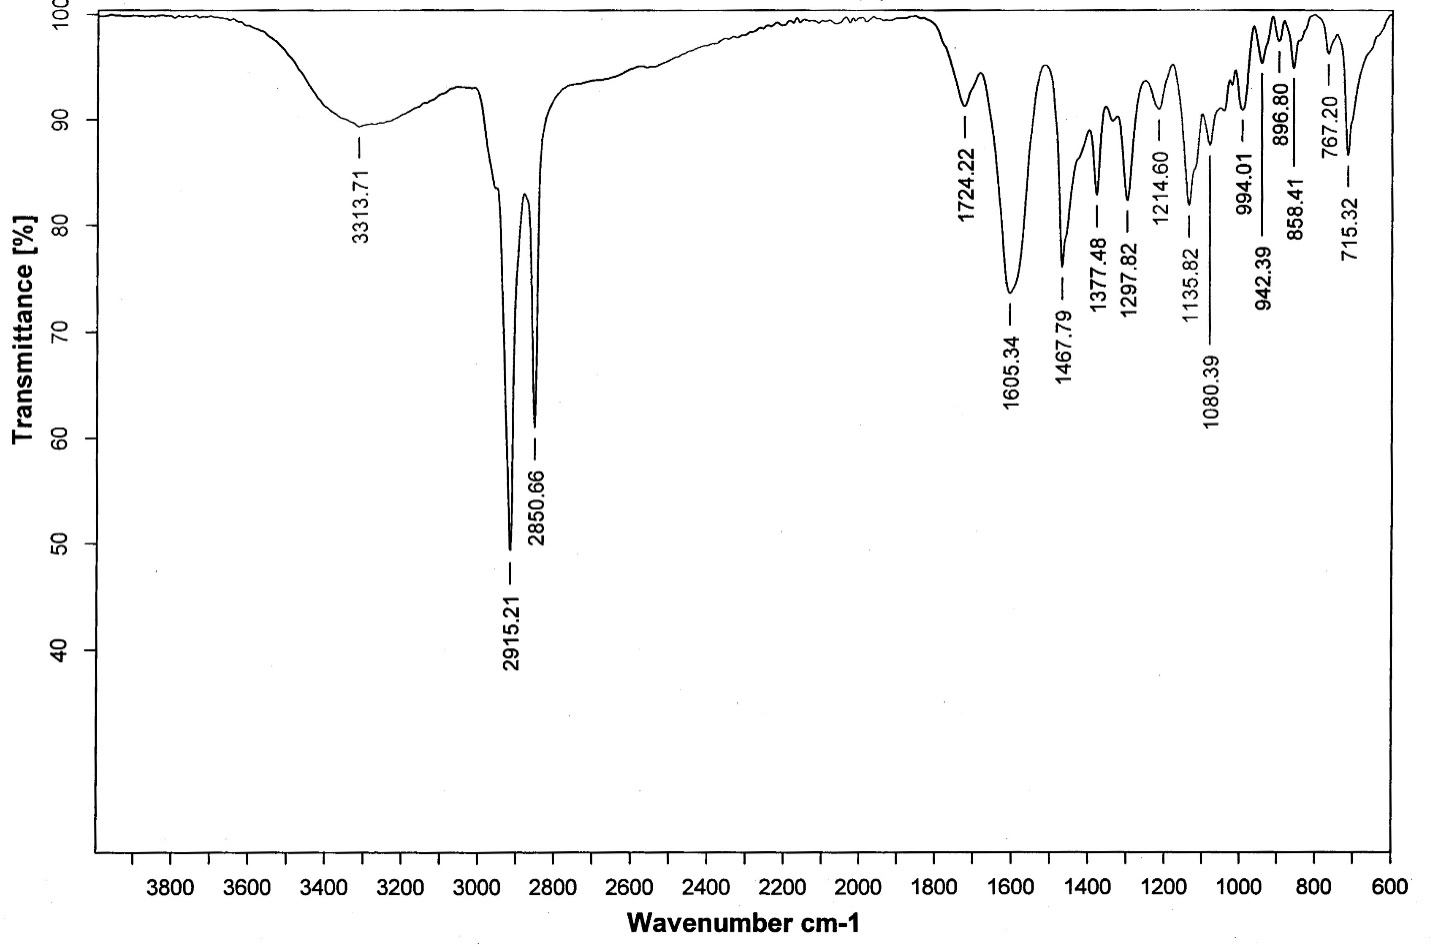


Fig.S1. IR spectrum of the hexadecylbis(2-hydroxypropyl)ammonium oxalate


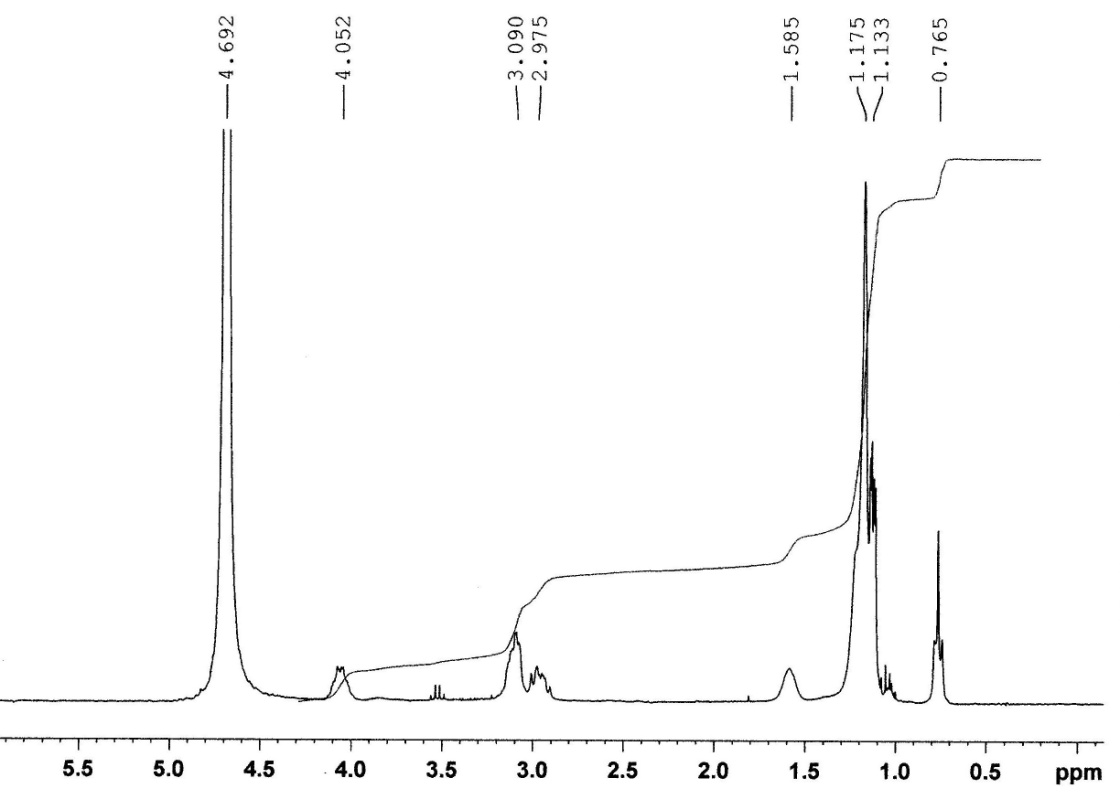


Fig.S2. 1H-NMR spectrum of the hexadecylbis(2-hydroxypropyl)ammonium oxalate


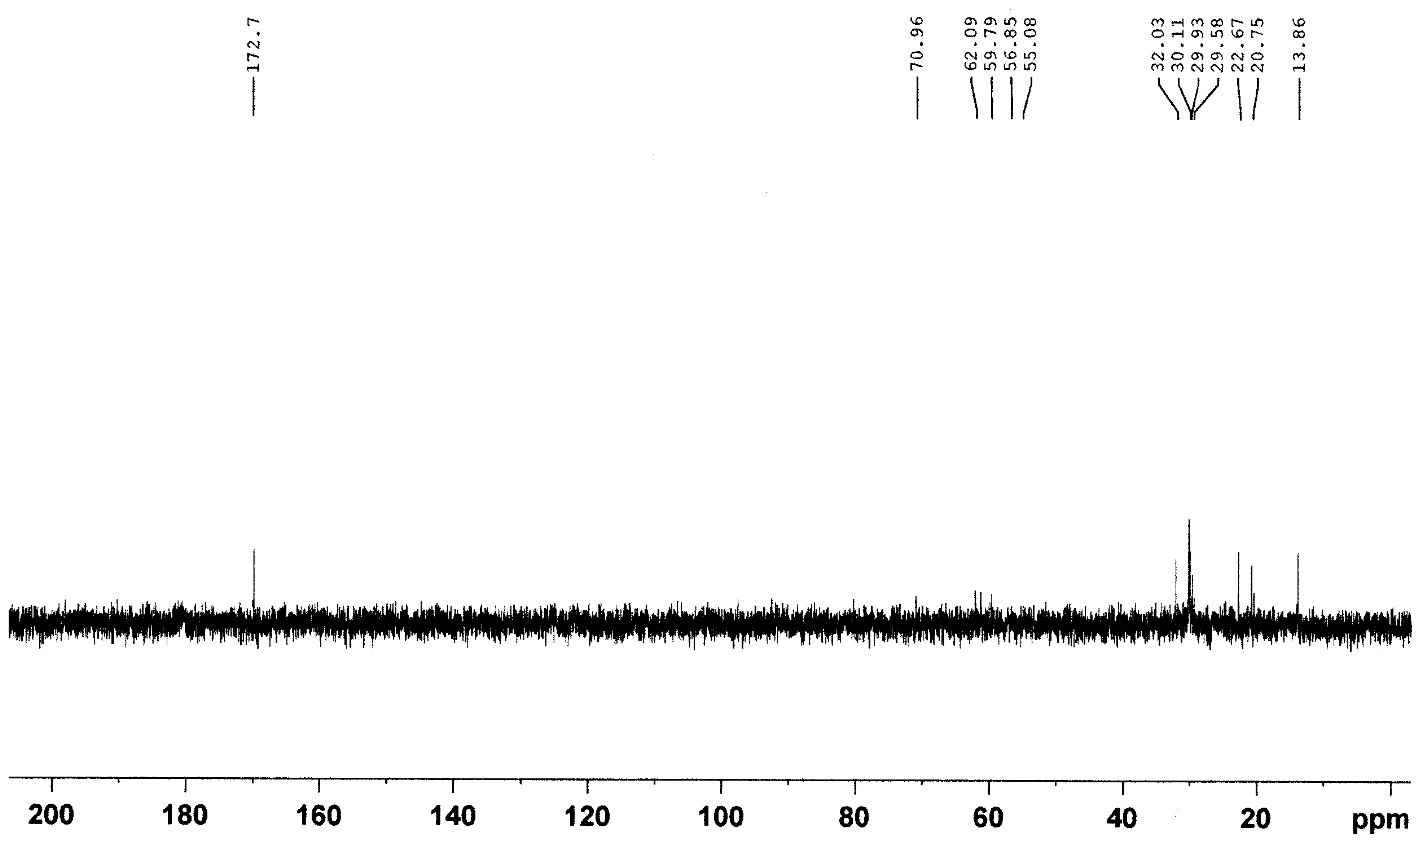


Fig.S3. 13C-NMR spectrum of the hexadecylbis(2-hydroxypropyl)ammonium oxalate


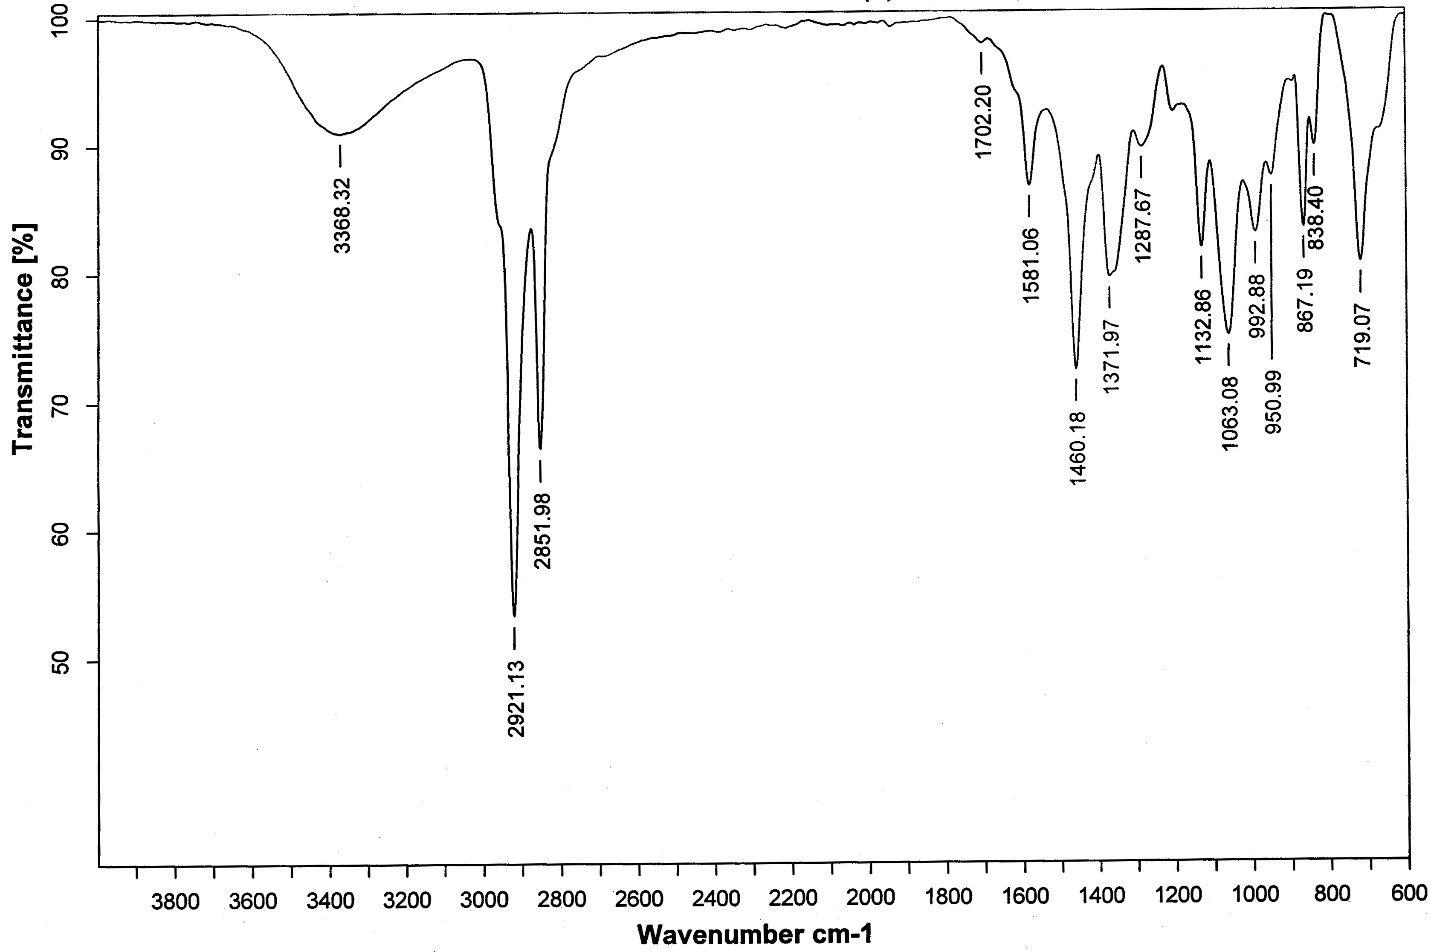


Fig.S4. IR spectrum of the hexadecylbis(2-hydroxypropyl)ammonium succinate


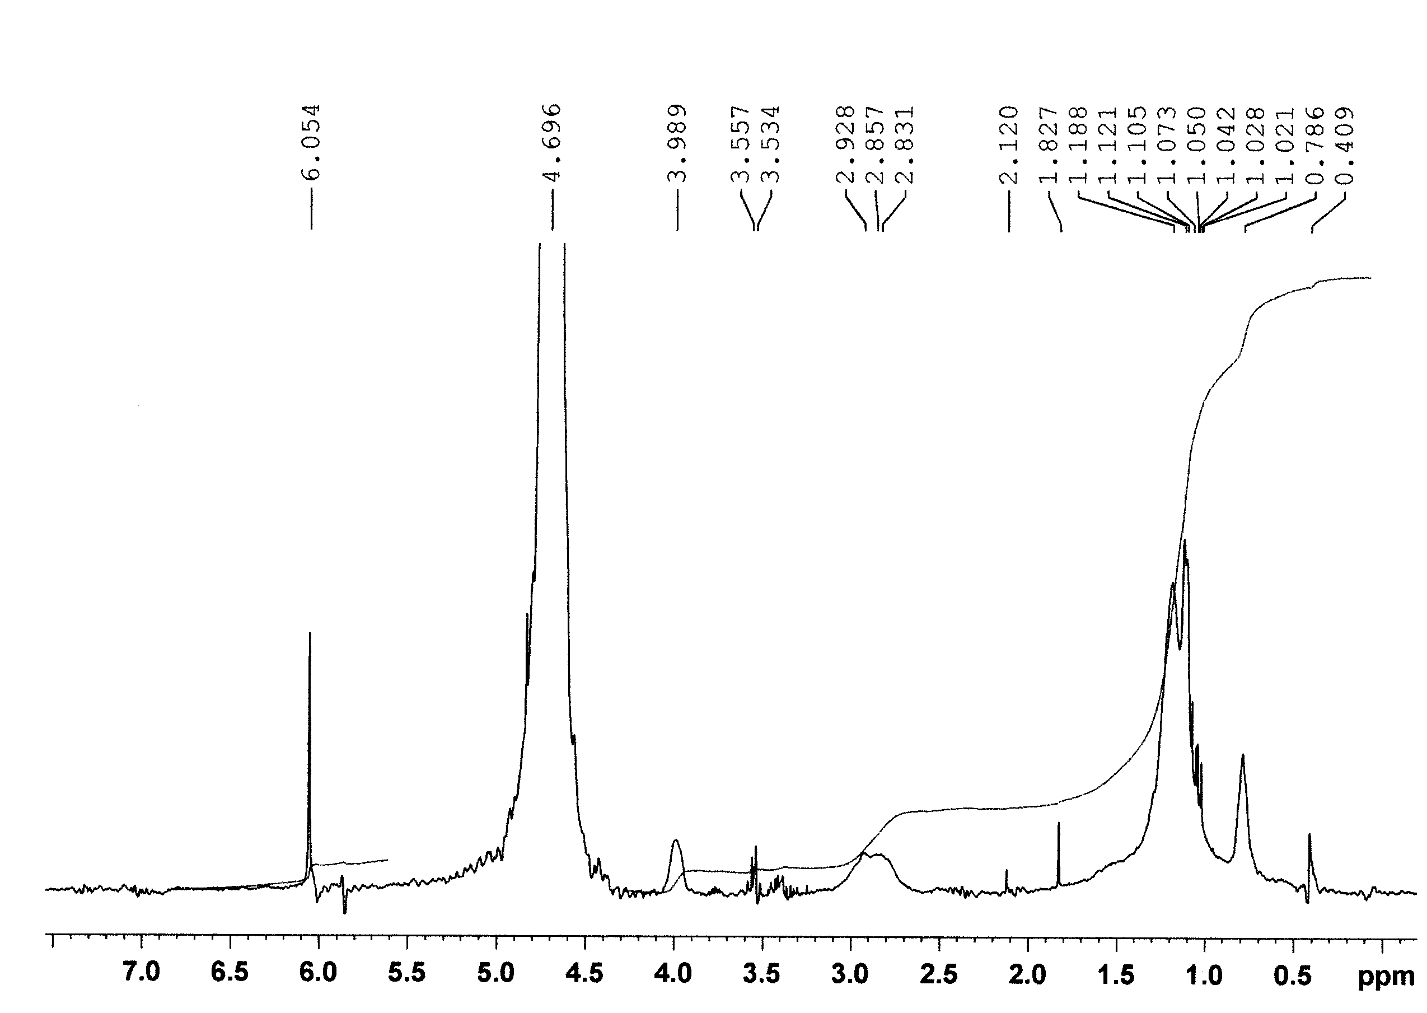


Fig.S5. 1H-NMR spectrum of the hexadecylbis(2-hydroxypropyl)ammonium succinate


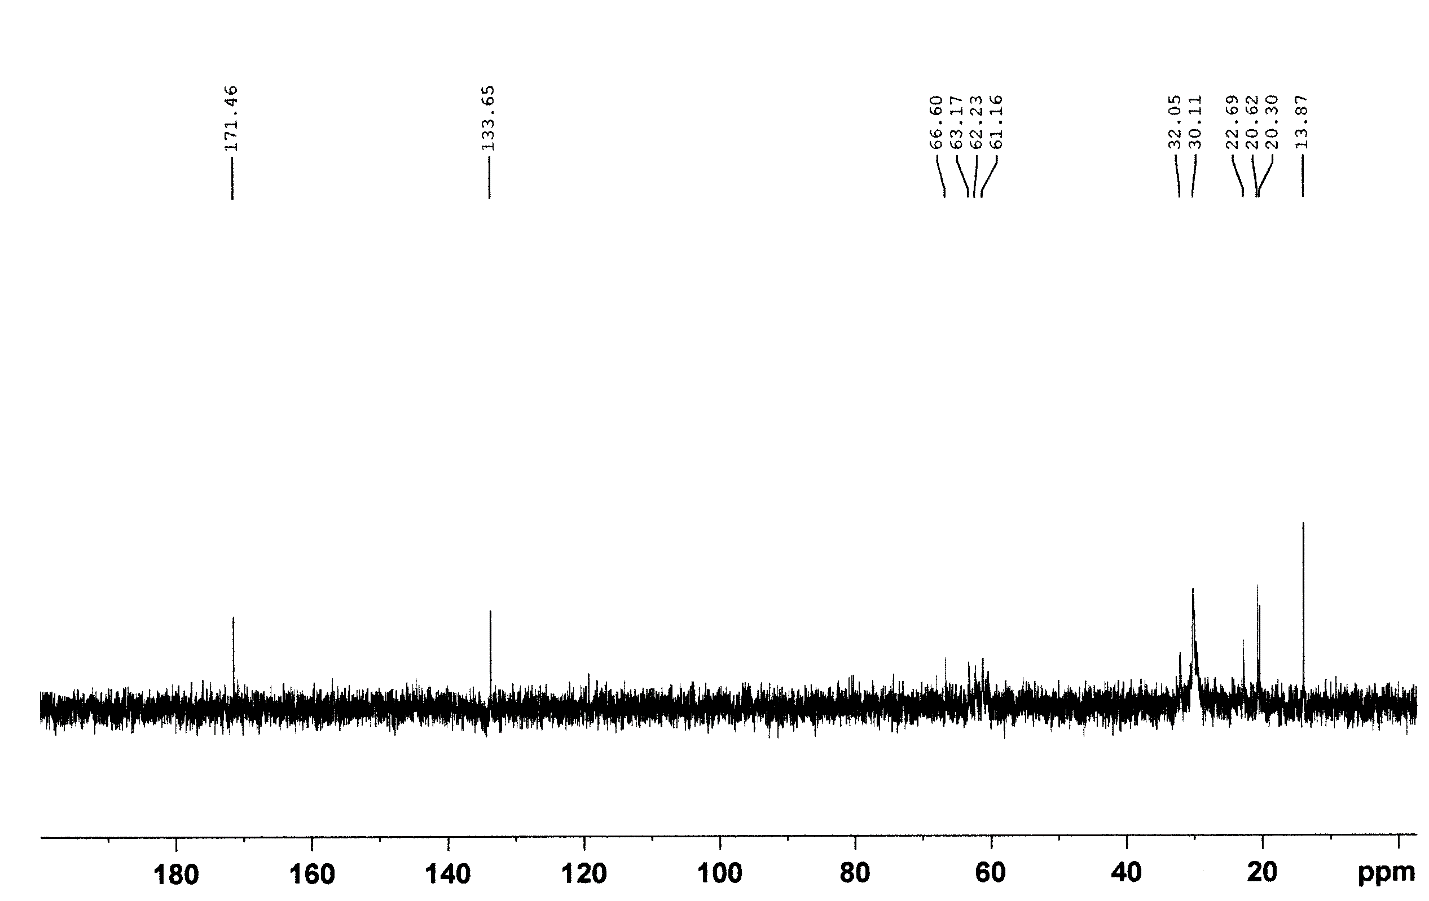


Fig.S6. 13C-NMR spectrum of the hexadecylbis(2-hydroxypropyl)ammonium succinate


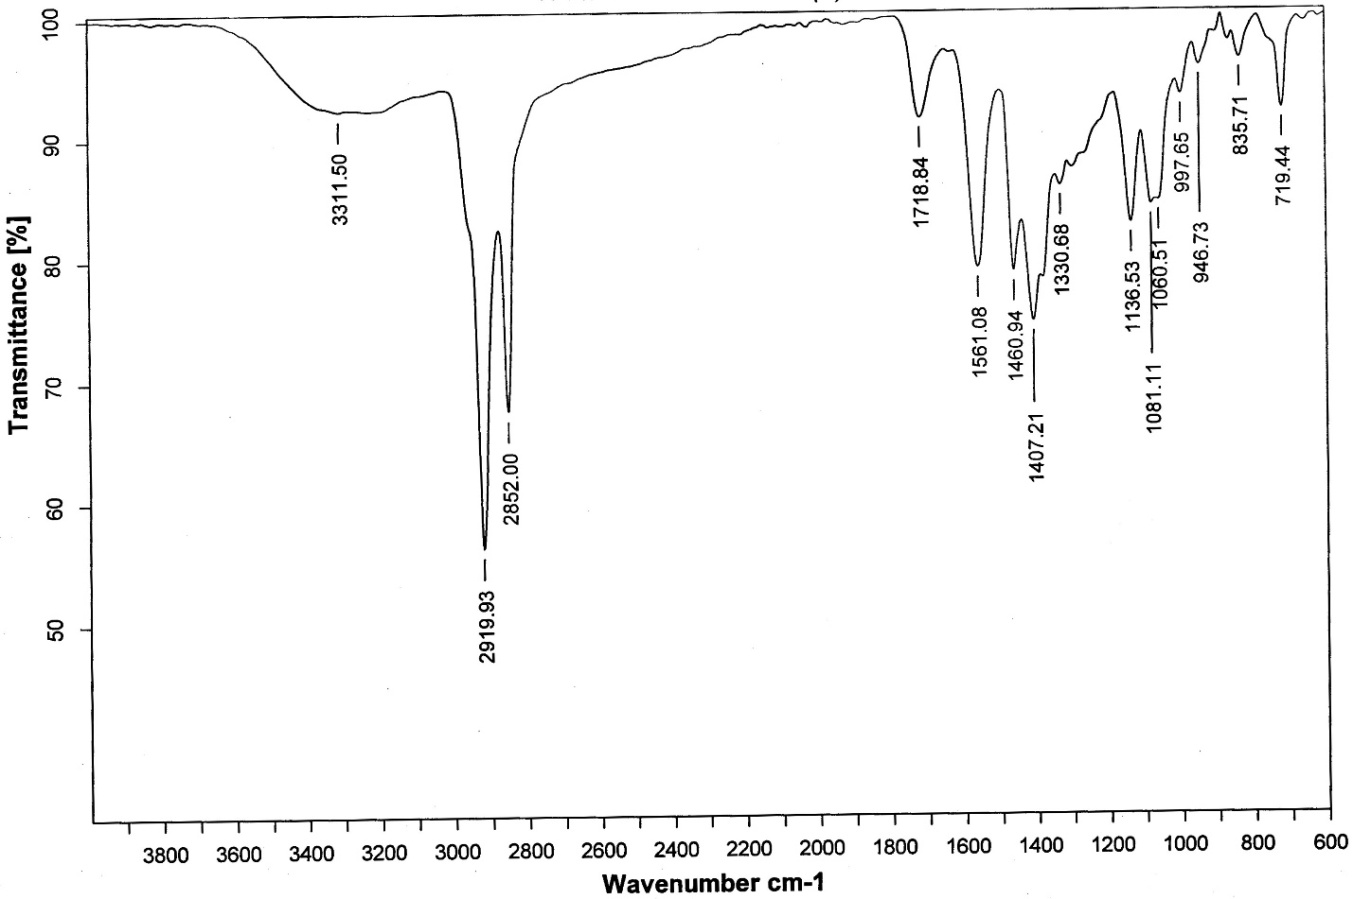


Fig.S7. IR spectrum of the hexadecylbis(2-hydroxypropyl)ammonium adipinate


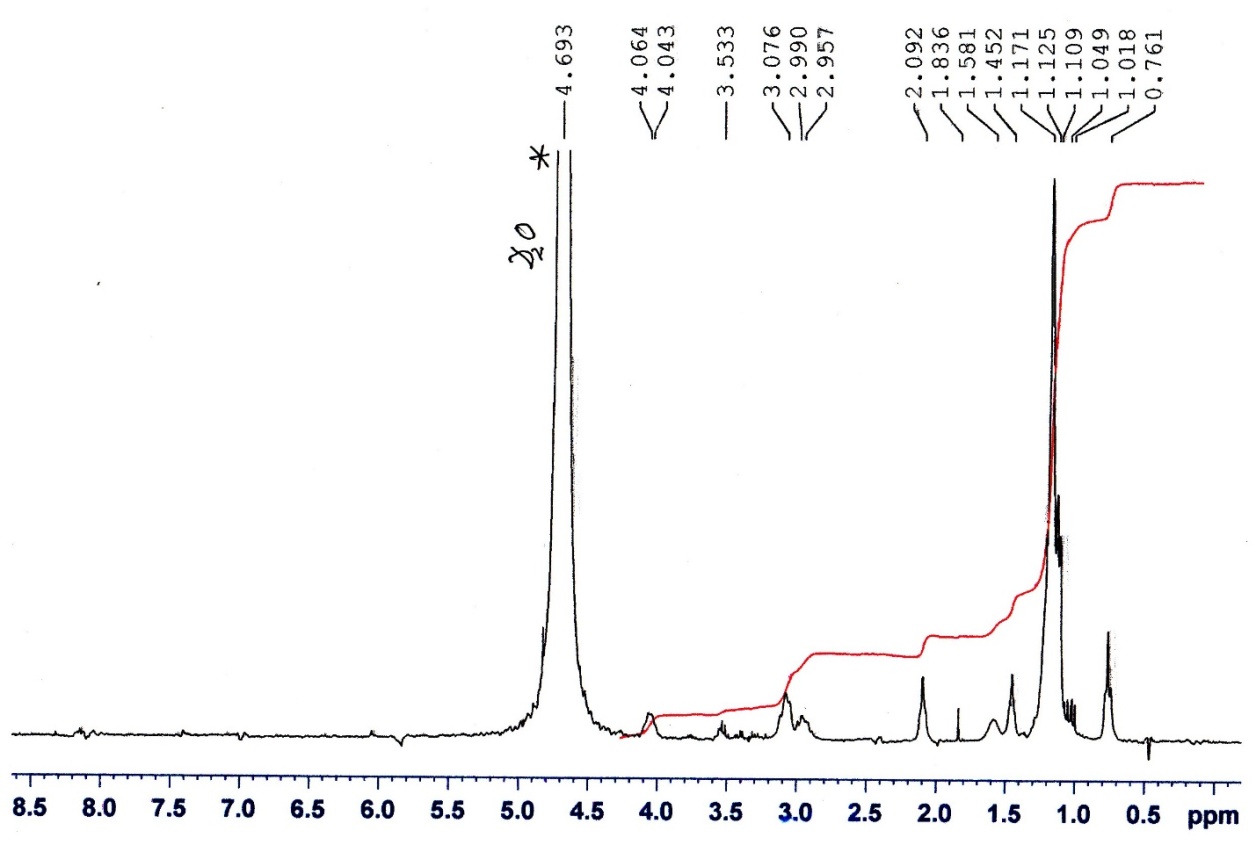


Fig.S8. 1H-NMR spectrum of the hexadecylbis(2-hydroxypropyl)ammonium adipinate


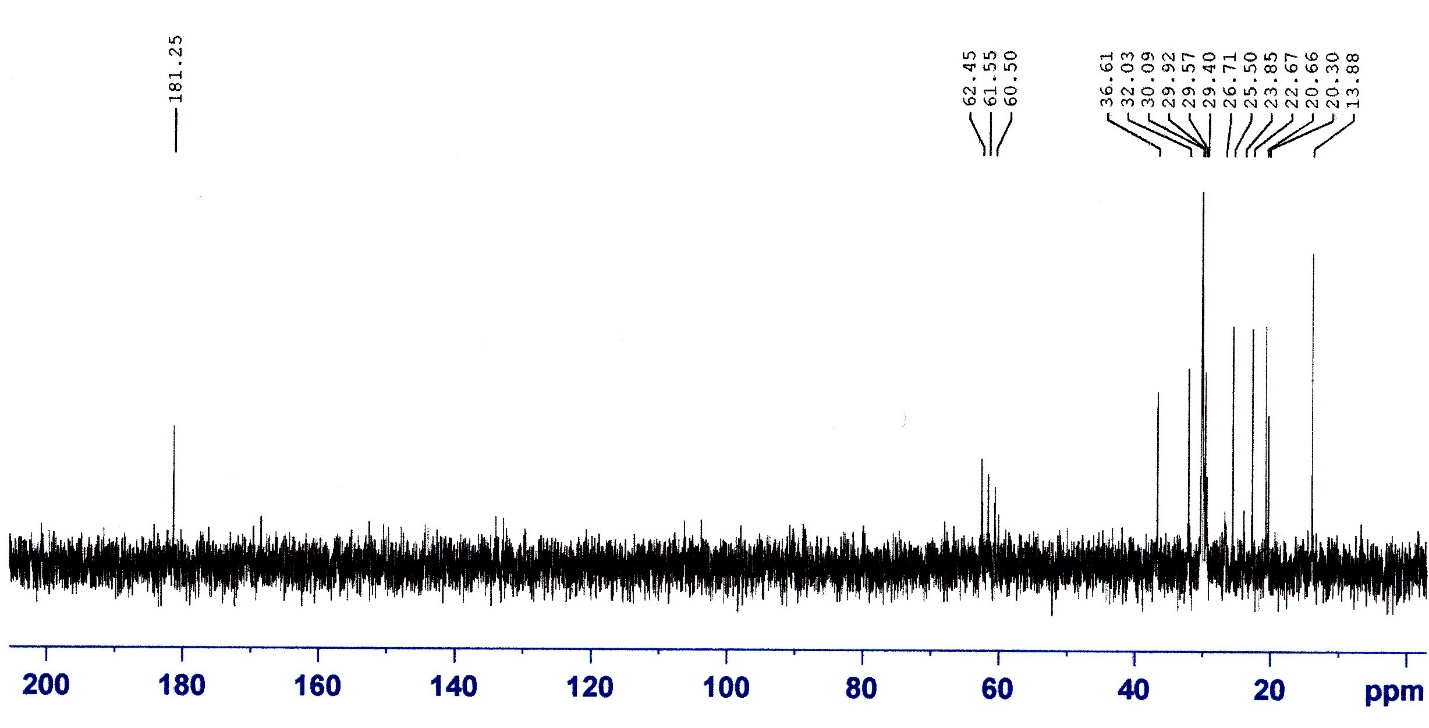


Fig.S9. 13C-NMR spectrum of the hexadecylbis(2-hydroxypropyl)ammonium adipinate


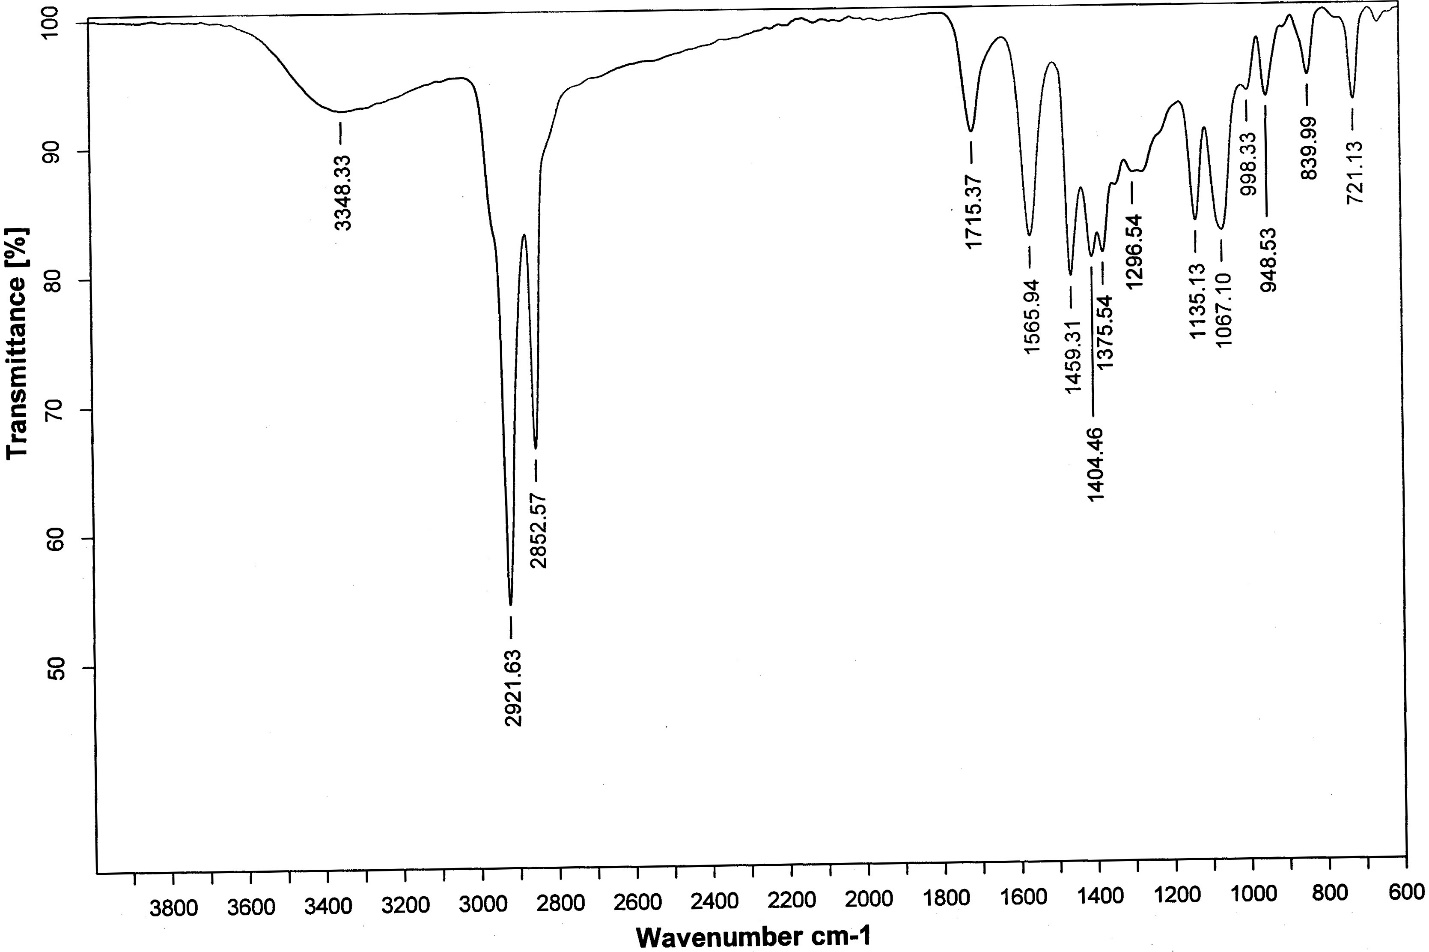


Fig.S10. IR spectrum of the hexadecylbis(2-hydroxypropyl)ammonium sebacate


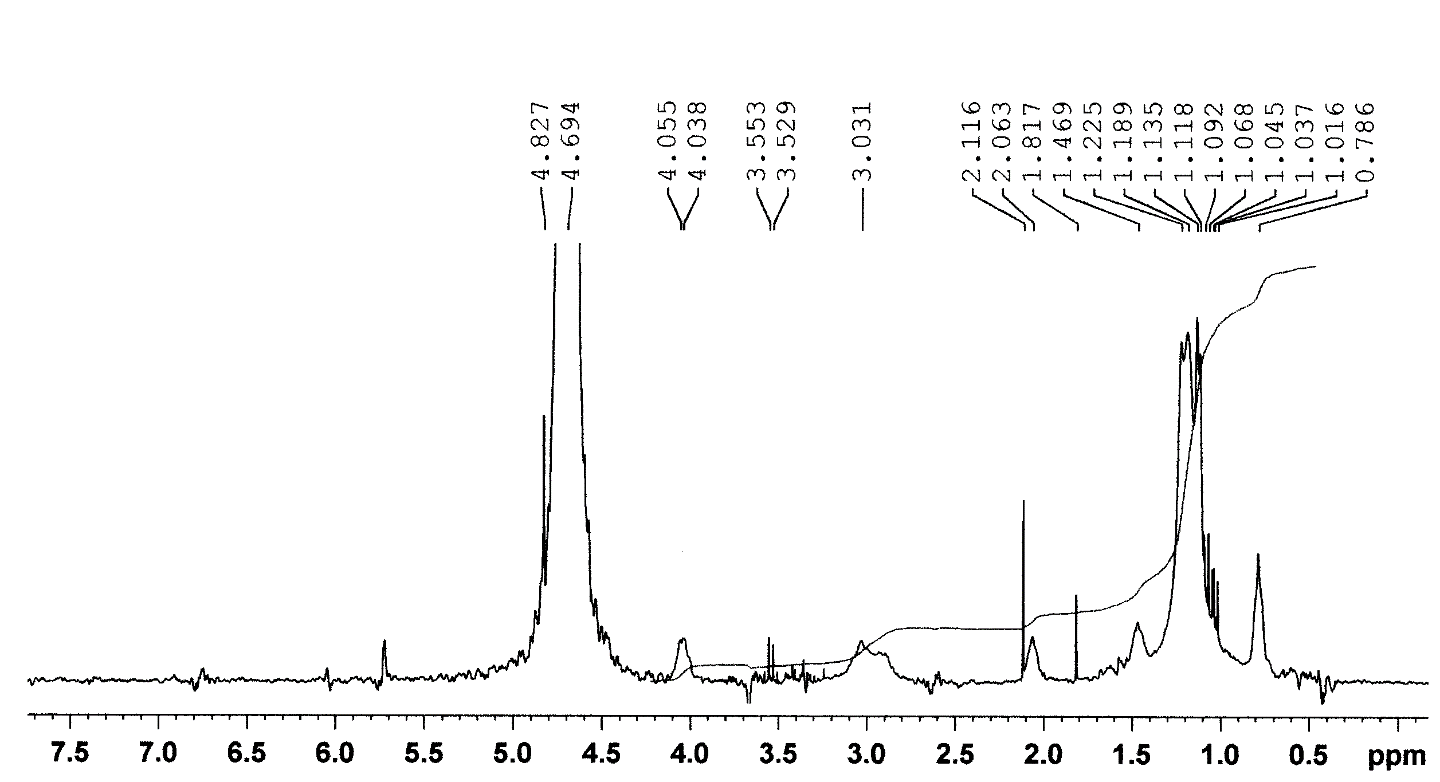


Fig.S11. 1H-NMR spectrum of the hexadecylbis(2-hydroxypropyl)ammonium sebacate


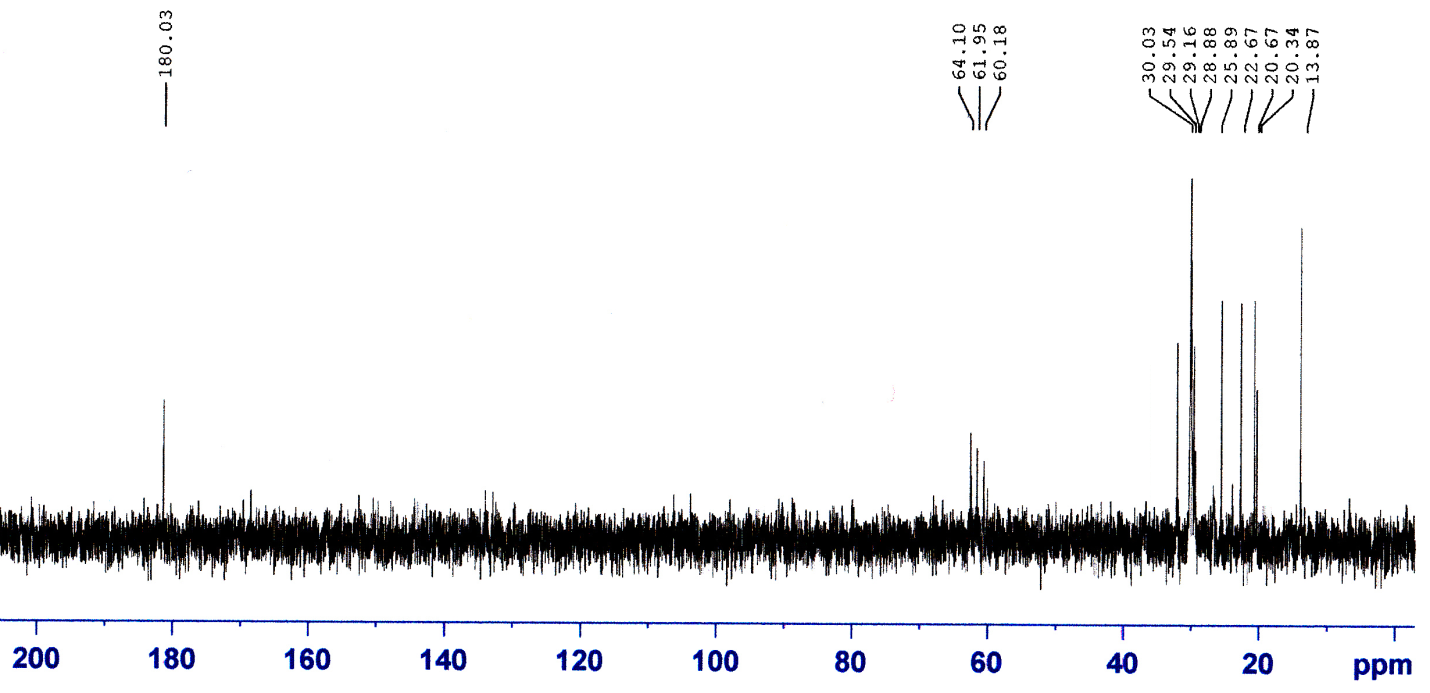


Fig.S12. 13C-NMR spectrum of the hexadecylbis(2-hydroxypropyl)ammonium sebacate


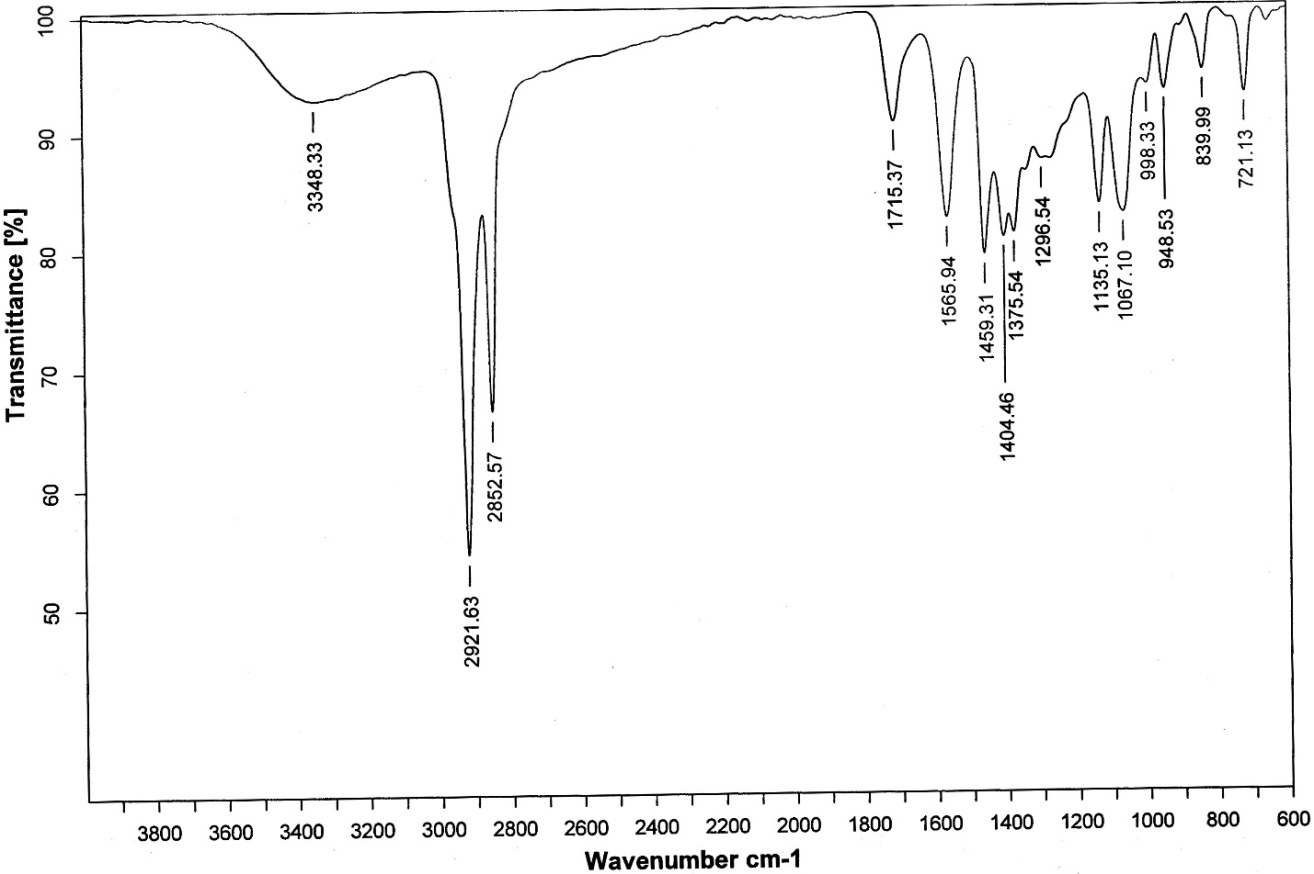


Fig.S13. IR spectrum of the hexadecylbis(2-hydroxypropyl)ammonium maleinate


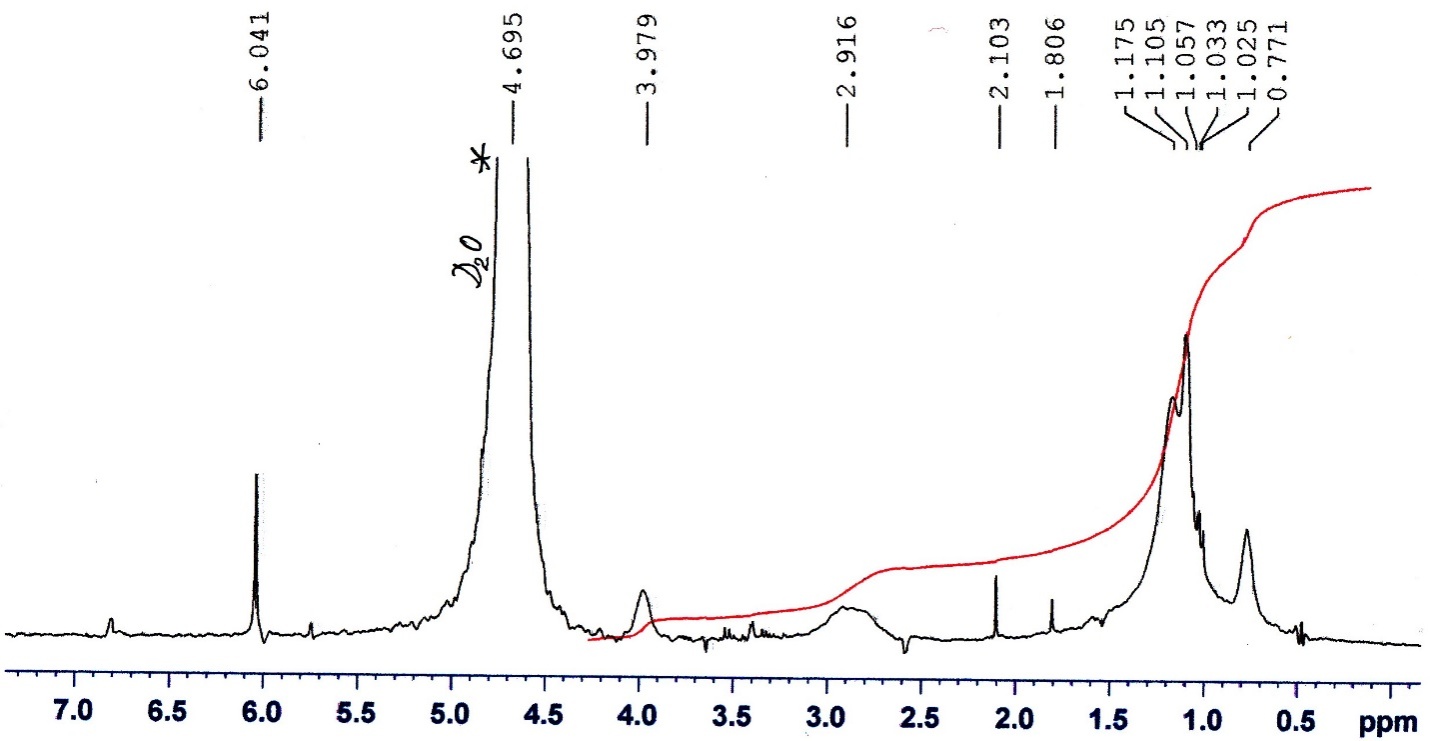


Fig.S14. 1H-NMR spectrum of the hexadecylbis(2-hydroxypropyl)ammonium maleinate


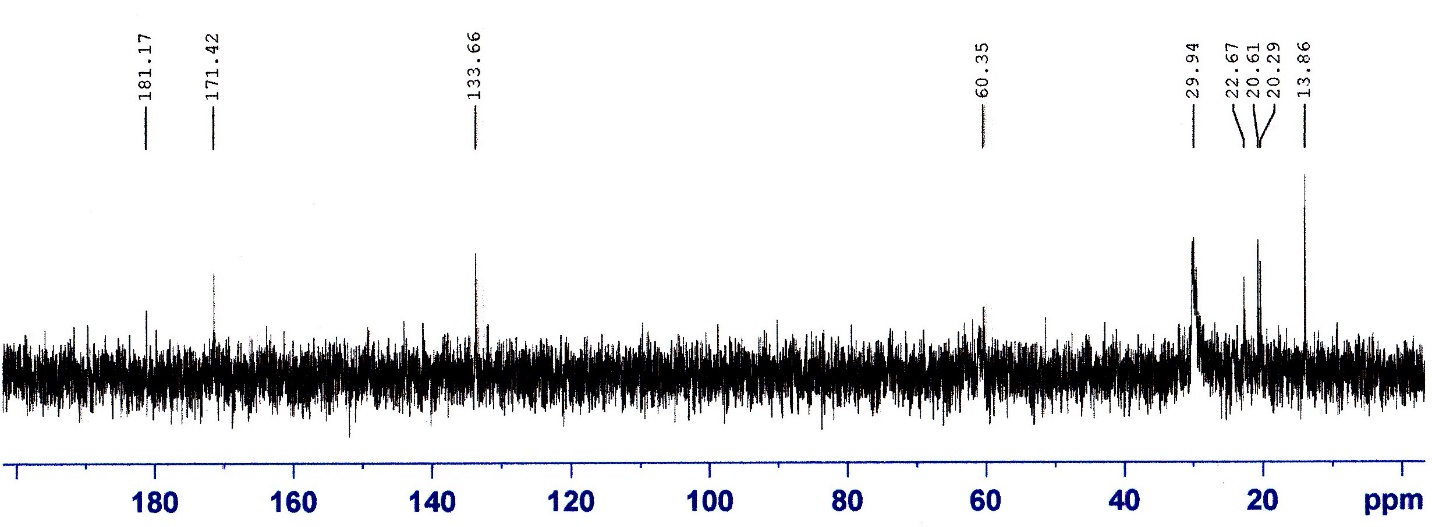


Fig.S15. 13C-NMR spectrum of the hexadecylbis(2-hydroxypropyl)ammonium maleinate


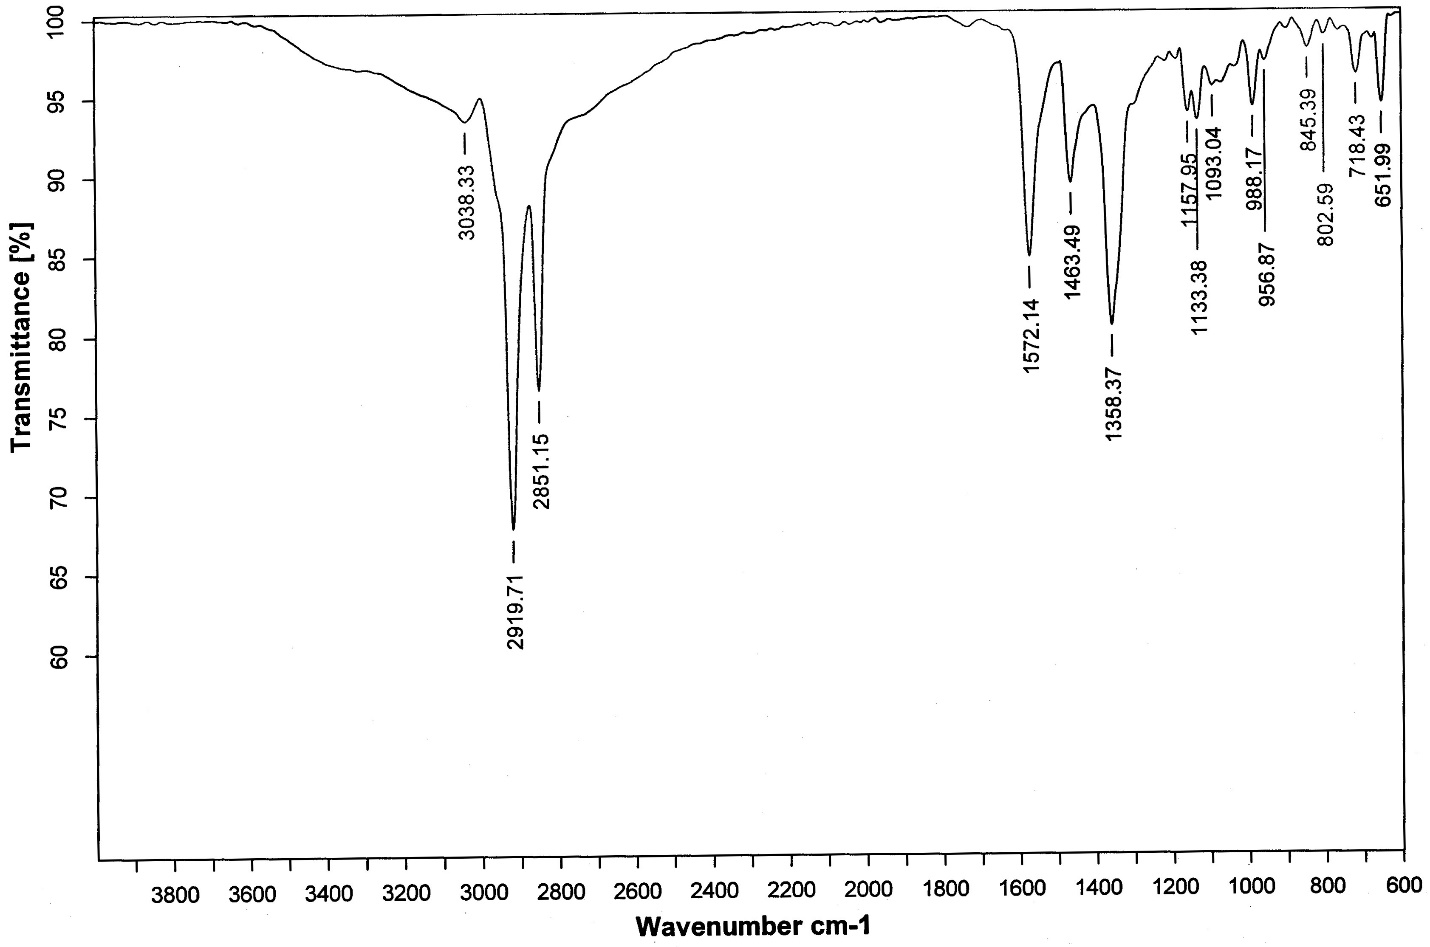


Fig.S16. IR spectrum of the hexadecylbis(2-hydroxypropyl)ammonium fumarate


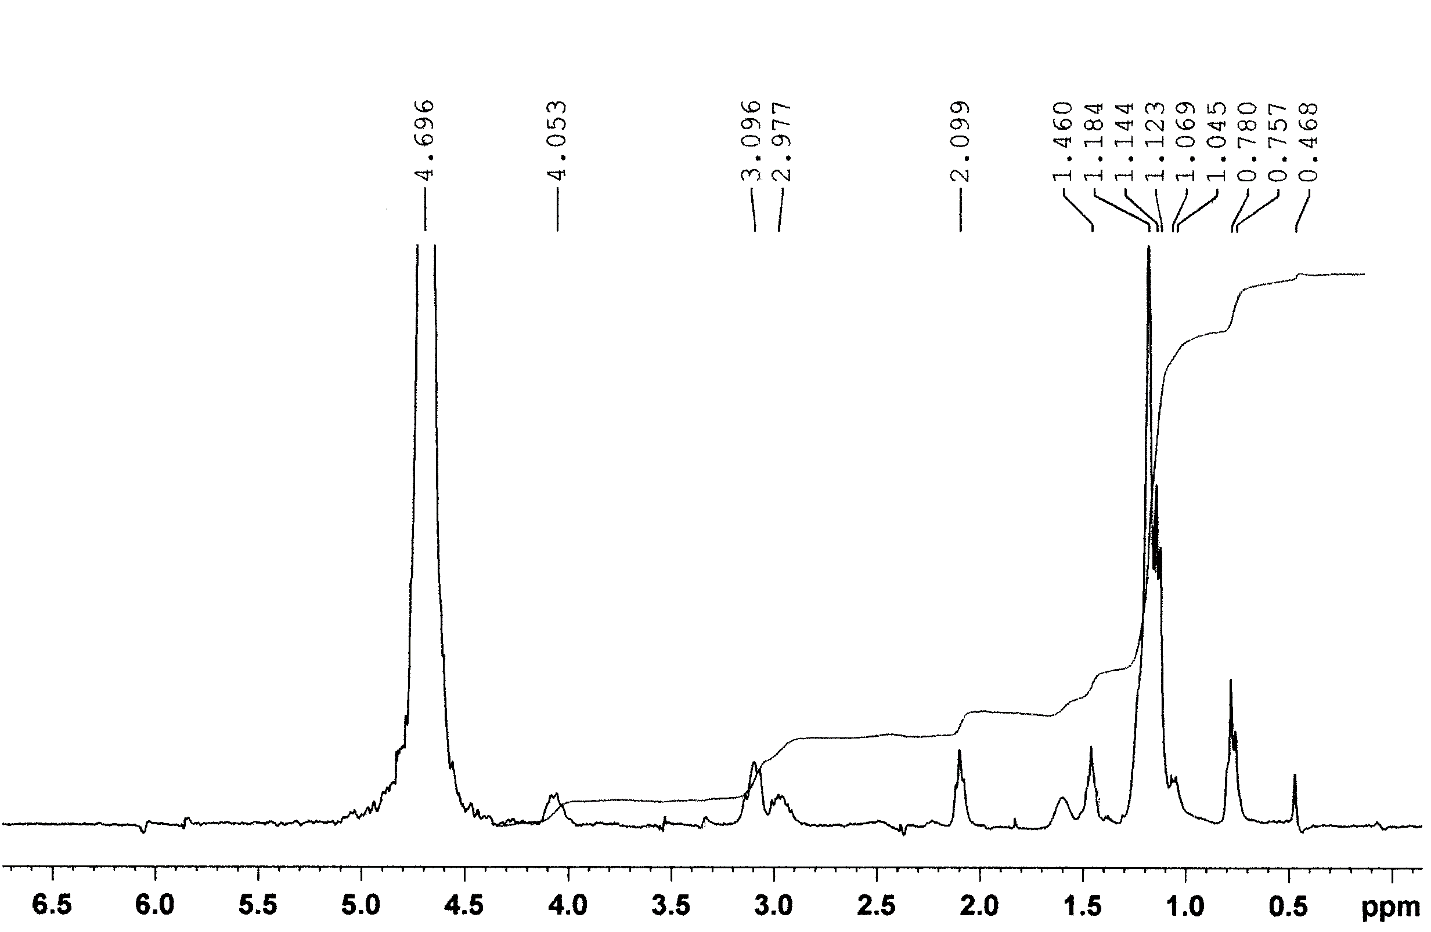


Fig.S17. 1H-NMR spectrum of the hexadecylbis(2-hydroxypropyl)ammonium fumarate


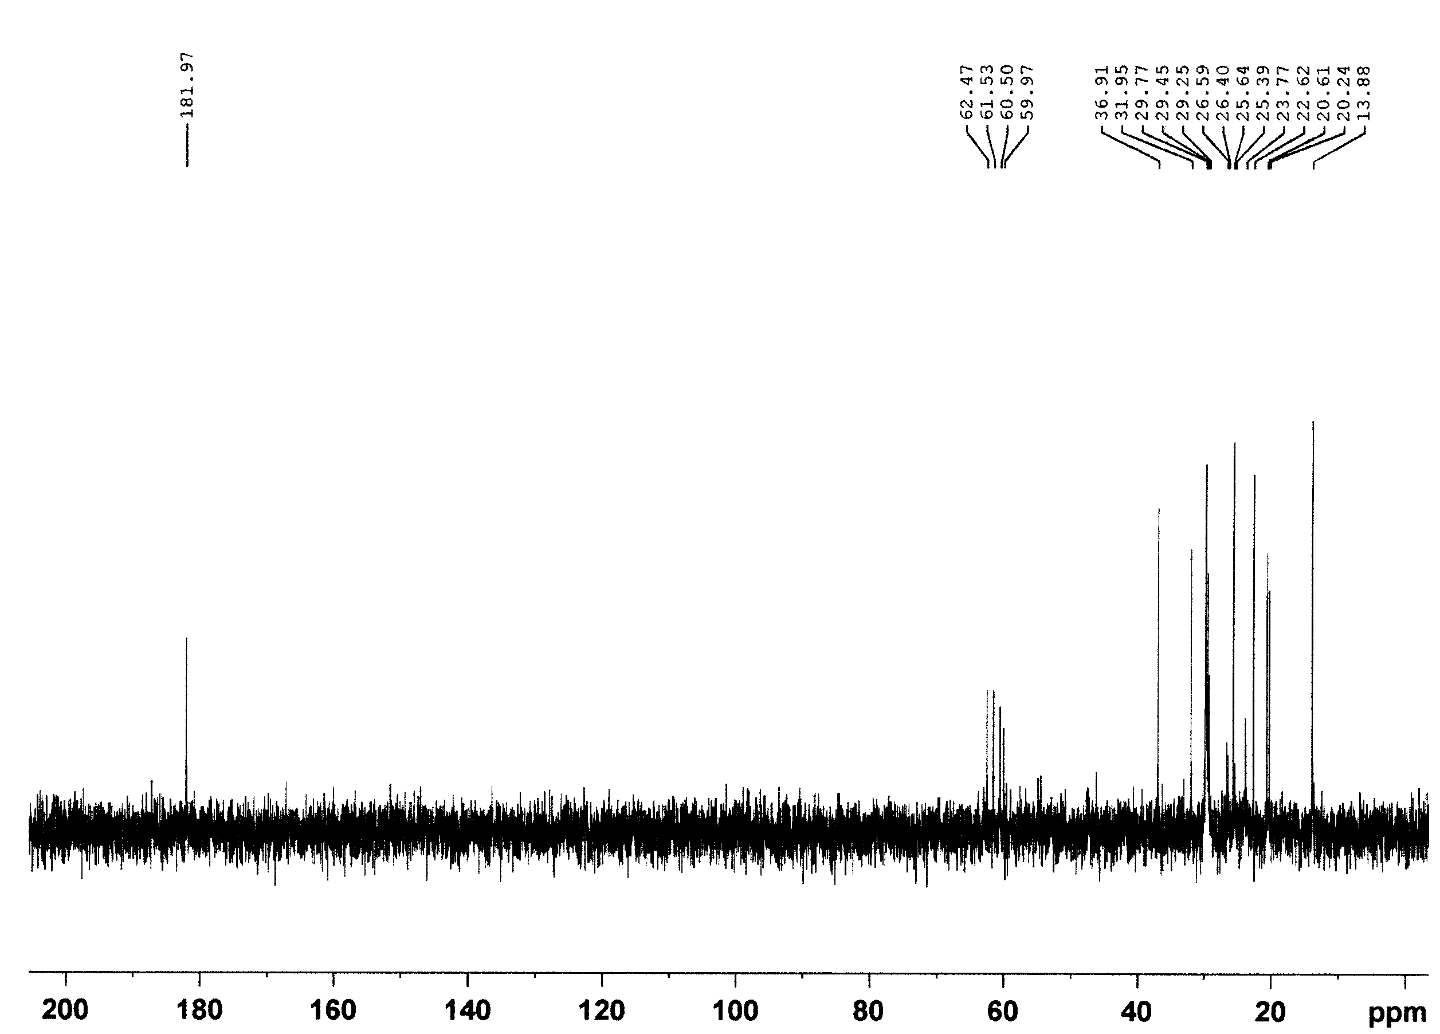


Fig.S18. 13C-NMR spectrum of the hexadecylbis(2-hydroxypropyl)ammonium fumarate


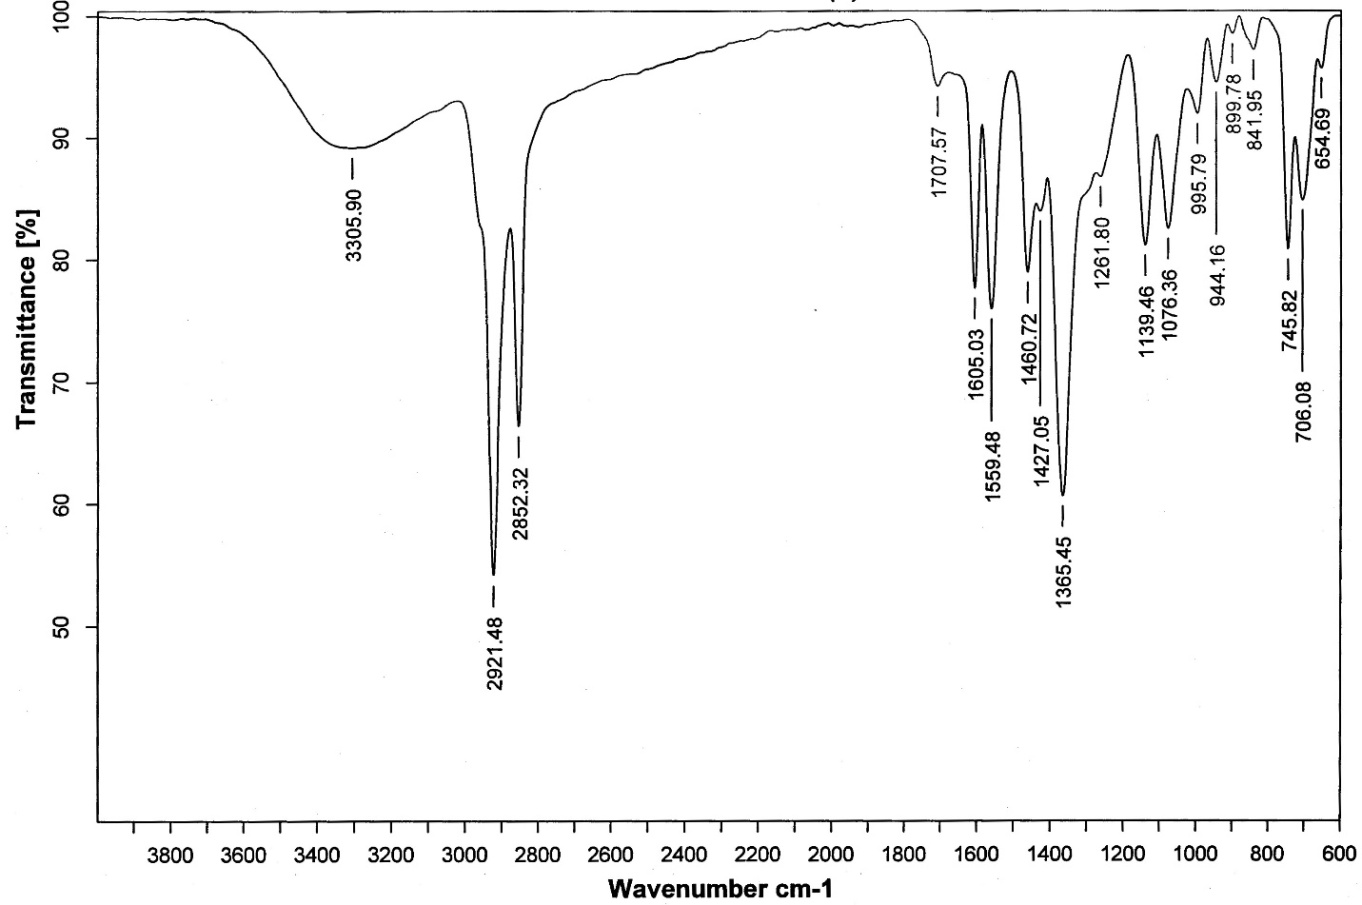


Fig.S19. IR spectrum of the hexadecylbis(2-hydroxypropyl)ammonium isophthalate


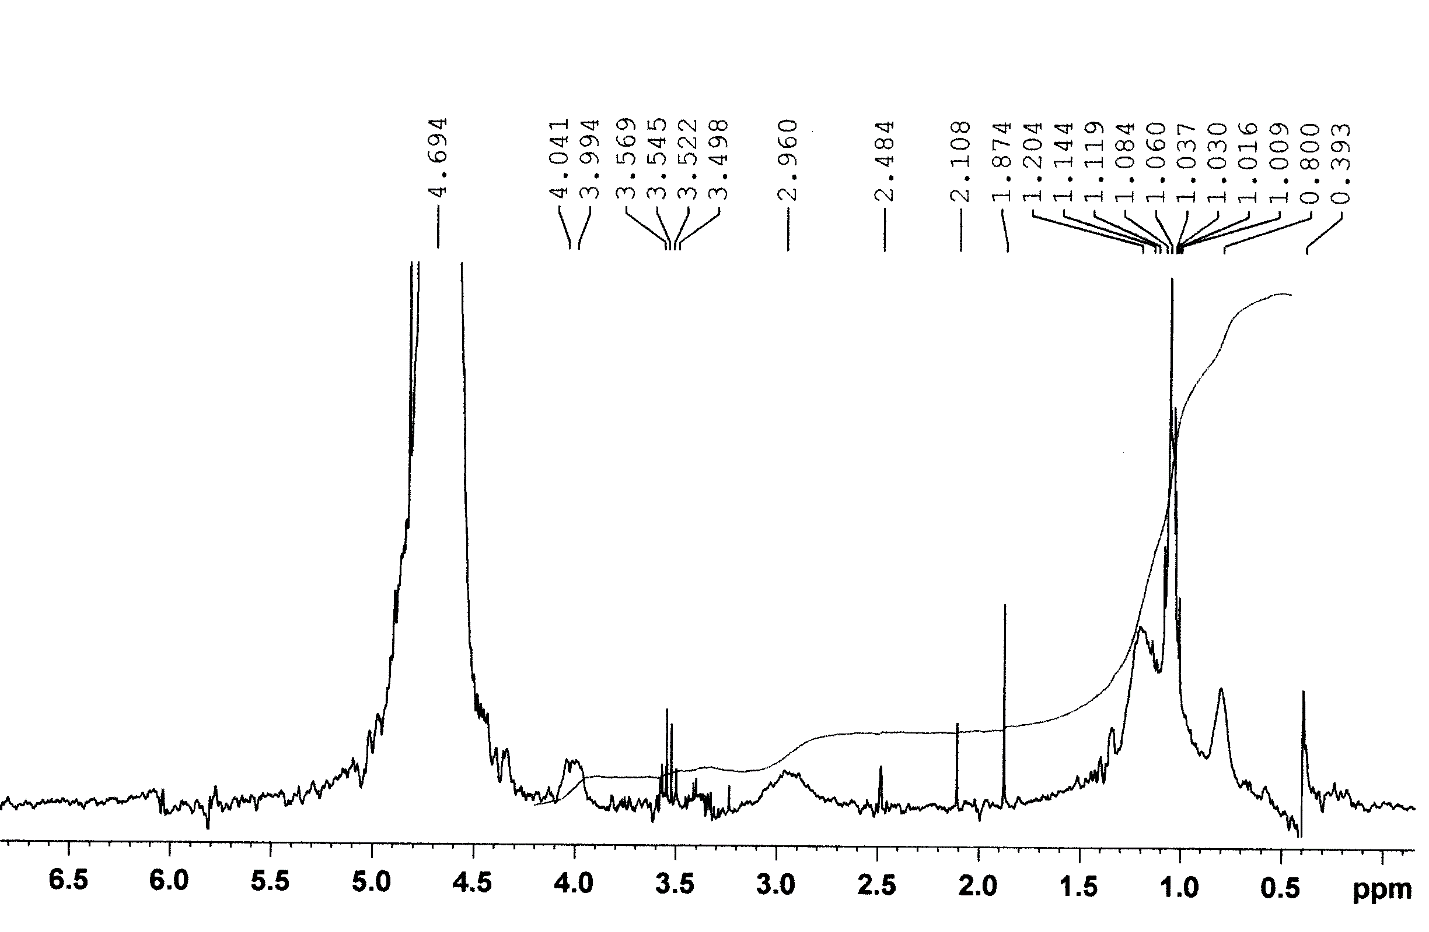


Fig.S20. 1H-NMR spectrum of the hexadecylbis(2-hydroxypropyl)ammonium isophthalate


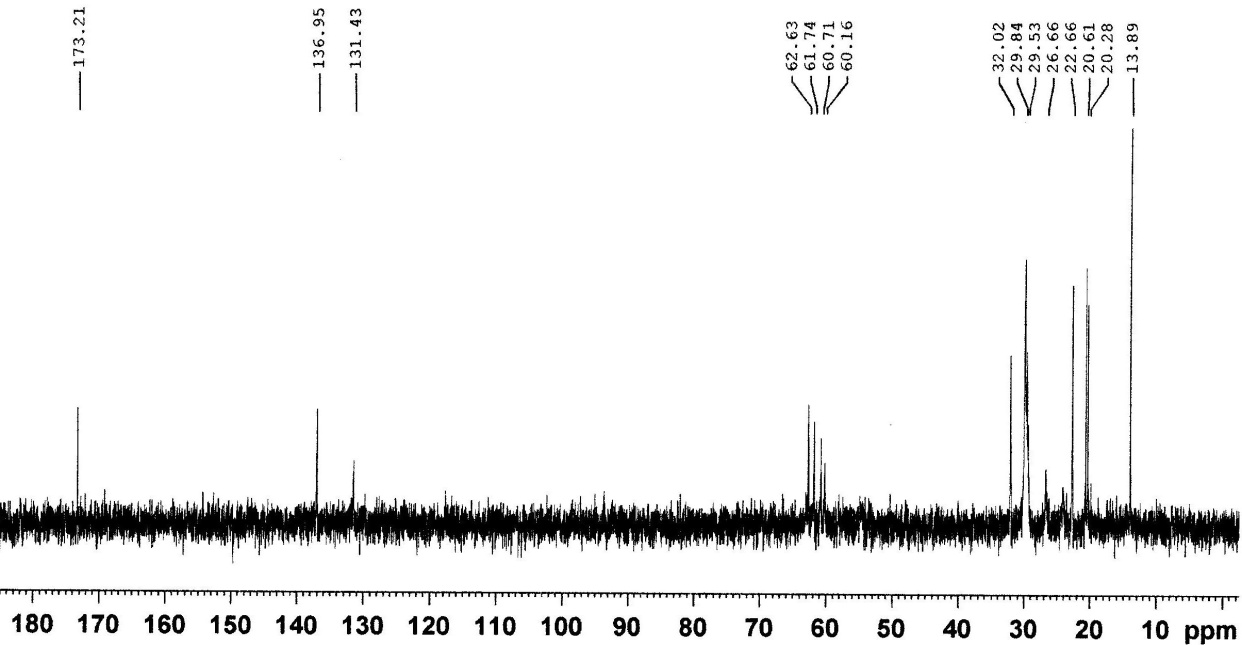


Fig.S21. 13C-NMR spectrum of the hexadecylbis(2-hydroxypropyl)ammonium isophthalate


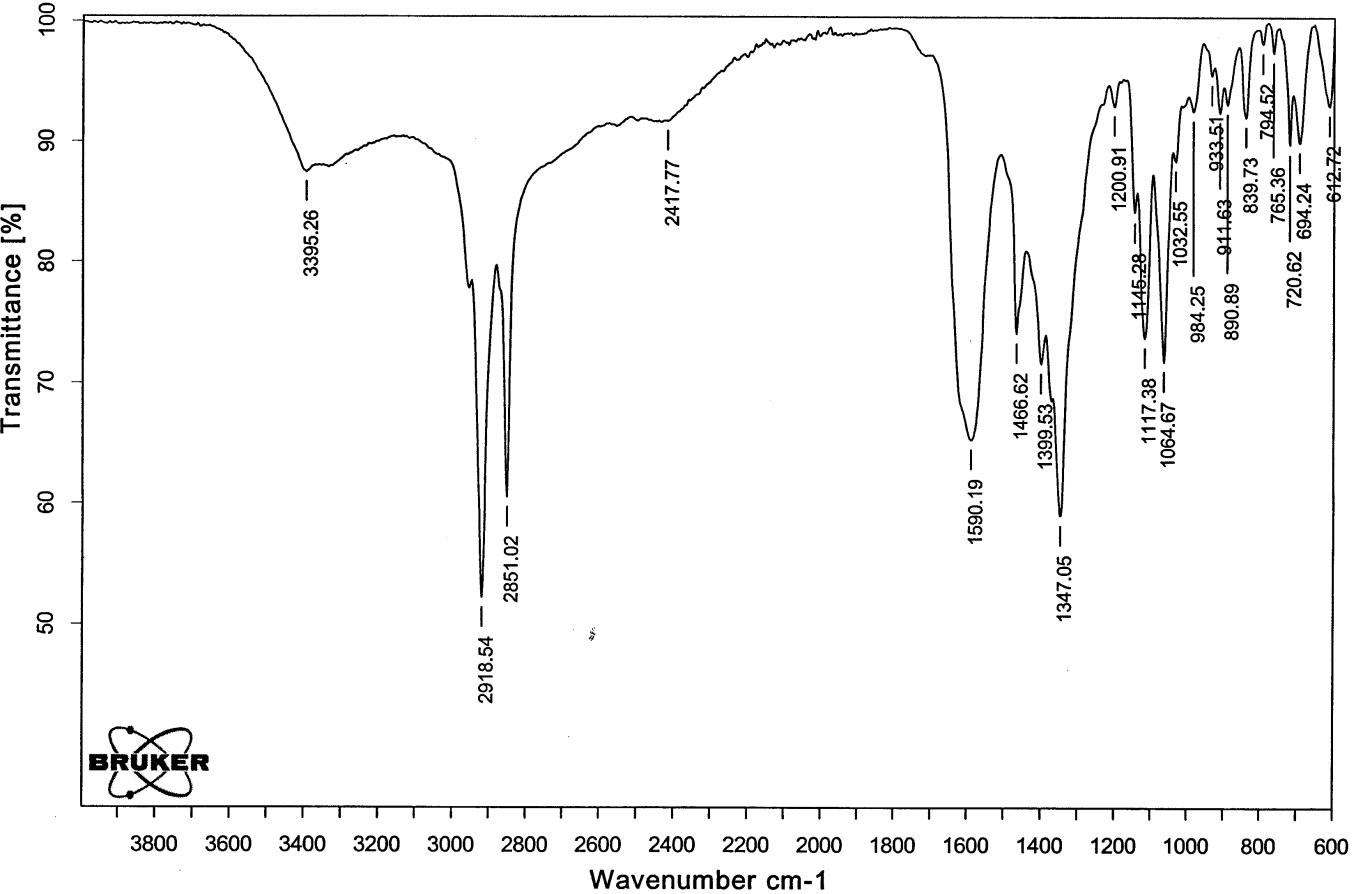


Fig.S22. IR spectrum of the hexadecylbis(2-hydroxypropyl)ammonium tartarate


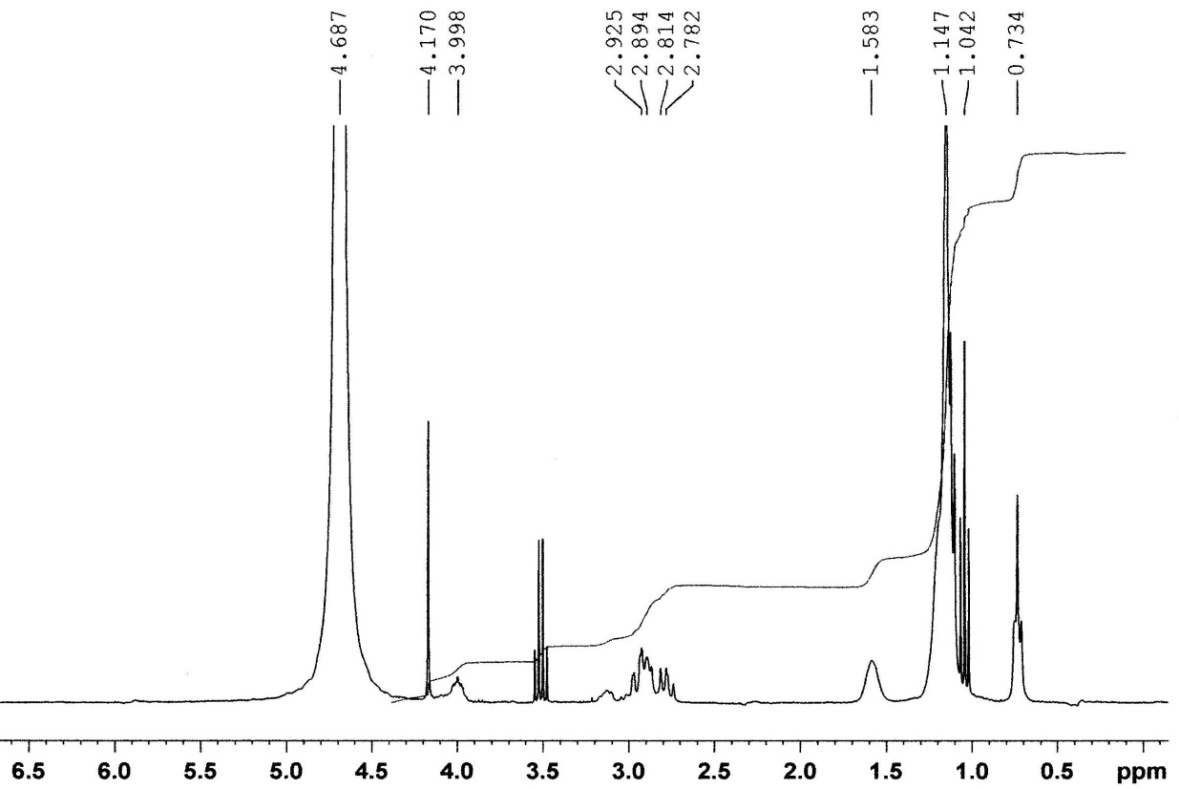


Fig.S23. 1H-NMR spectrum of the hexadecylbis(2-hydroxypropyl)ammonium tartarate


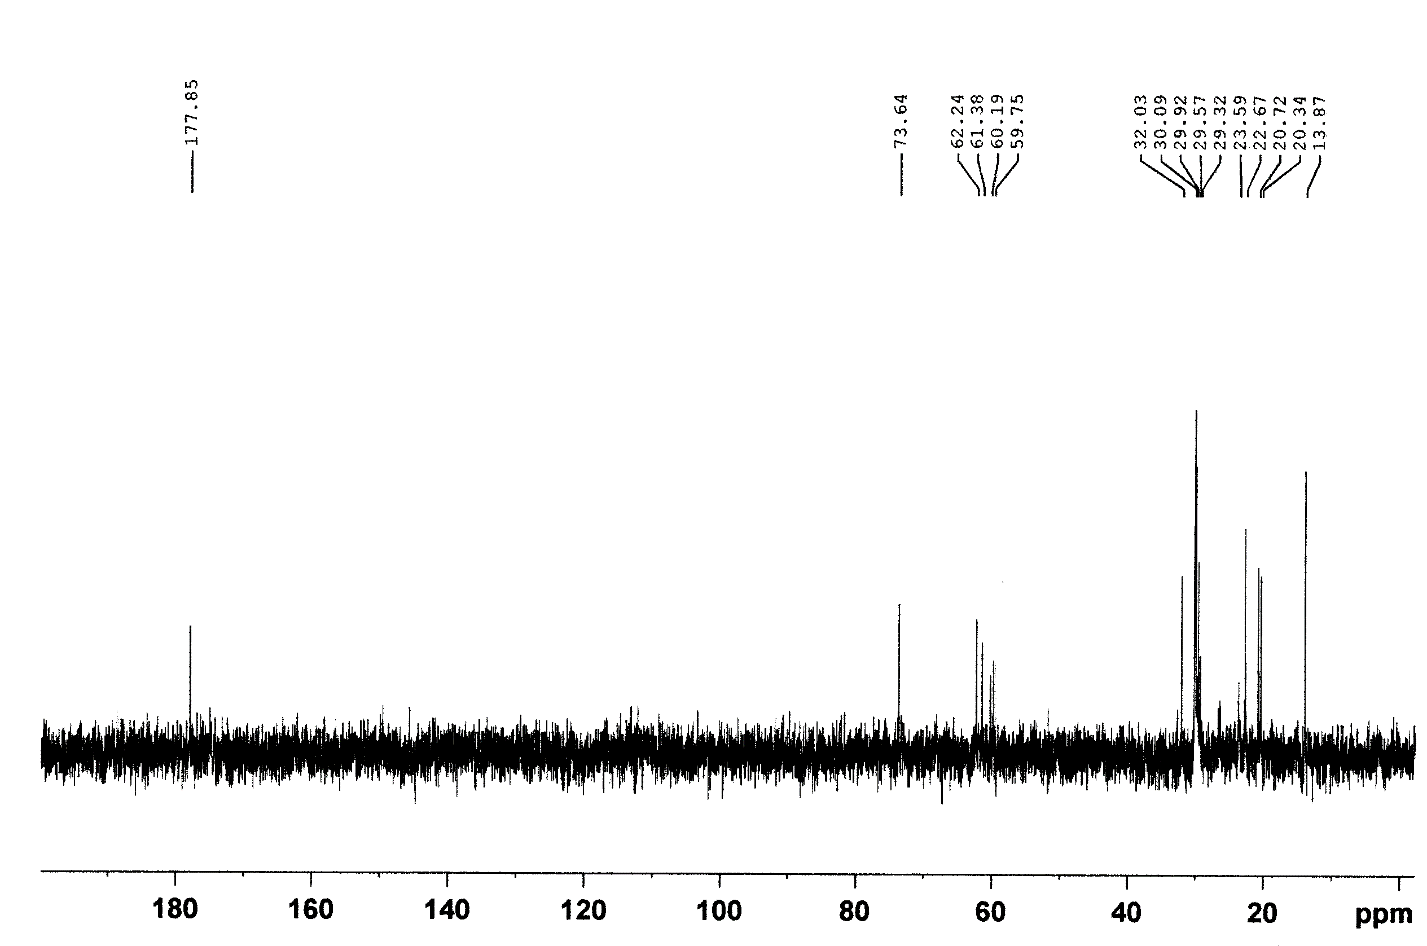


Fig.S24. 13C-NMR spectrum of the hexadecylbis(2-hydroxypropyl)ammonium tartarate
